# Supplementary material
Source: PubMed Central journal article supplement (PMC151290)
Supplement: gb-2003-4-1-r6-s2.pdf [file gb-2003-4-1-r6-s2.pdf]

| <b>Gene name</b> | <b>Simultaneous<br/>20 genes</b>                                                                                                                                                                                                                                                                                                                                                                                                                                                    |
|------------------|-------------------------------------------------------------------------------------------------------------------------------------------------------------------------------------------------------------------------------------------------------------------------------------------------------------------------------------------------------------------------------------------------------------------------------------------------------------------------------------|
| <b>CDC28</b>     | CLN3 expression ratio $\leq 1.3$<br>  MCM1 expression ratio $\leq 1.1$<br>    CDC34 expression ratio $\leq 0.7$<br>      CLB6 expression ratio $\leq 1$ = downregulated<br>      CLB6 expression ratio $> 1$ = upregulated<br>    CDC34 expression ratio $> 0.7$ = downregulated<br>  MCM1 expression ratio $> 1.1$ = upregulated<br>CLN3 expression ratio $> 1.3$ = upregulated                                                                                                    |
| <b>MBP1</b>      | CDC34 expression ratio $\leq 1$ = upregulated<br>CDC34 expression ratio $> 1$ = downregulated                                                                                                                                                                                                                                                                                                                                                                                       |
| <b>CDC53</b>     | CLB6 expression ratio $\leq 0.7$ = downregulated<br>CLB6 expression ratio $> 0.7$<br>  SWI5 expression ratio $\leq 0.5$ = downregulated<br>  SWI5 expression ratio $> 0.5$<br>    CLN3 expression ratio $\leq 1.2$ = upregulated<br>    CLN3 expression ratio $> 1.2$<br>      HCT1 expression ratio $\leq 1$ = upregulated<br>      HCT1 expression ratio $> 1$ = downregulated                                                                                                    |
| <b>CDC34</b>     | MBP1 expression ratio $\leq 1.2$ = upregulated<br>MBP1 expression ratio $> 1.2$ = downregulated                                                                                                                                                                                                                                                                                                                                                                                     |
| <b>SWI5</b>      | CLB2 expression ratio $\leq 0.8$ = downregulated<br>CLB2 expression ratio $> 0.8$<br>  SWI4 expression ratio $\leq 1.1$ = upregulated<br>  SWI4 expression ratio $> 1.1$ = downregulated                                                                                                                                                                                                                                                                                            |
| <b>SKP1</b>      | CDC34 expression ratio $\leq 0.9$ = downregulated<br>CDC34 expression ratio $> 0.9$ = upregulated                                                                                                                                                                                                                                                                                                                                                                                   |
| <b>SWI4</b>      | SKP1 expression ratio $\leq 0.6$ = downregulated<br>SKP1 expression ratio $> 0.6$<br>  MBP1 expression ratio $\leq 0.7$ = upregulated<br>  MBP1 expression ratio $> 0.7$<br>    CDC53 expression ratio $\leq 1$<br>      SIC1 expression ratio $\leq 0.6$ = upregulated<br>      SIC1 expression ratio $> 0.6$ = downregulated<br>    CDC53 expression ratio $> 1$ = upregulated                                                                                                    |
| <b>HCT1</b>      | SWI6 expression ratio $\leq 1.2$<br>  CLN1 expression ratio $\leq 2$<br>    CDC53 expression ratio $\leq 1$ = upregulated<br>    CDC53 expression ratio $> 1$<br>      CLB1 expression ratio $\leq 0.7$ = downregulated<br>      CLB1 expression ratio $> 0.7$<br>        CLB1 expression ratio $\leq 0.8$ = upregulated<br>        CLB1 expression ratio $> 0.8$ = downregulated<br>  CLN1 expression ratio $> 2$ = downregulated<br>SWI6 expression ratio $> 1.2$ = downregulated |
| <b>CDC20</b>     | CLN1 expression ratio $\leq 1.2$<br>  MBP1 expression ratio $\leq 0.8$ = upregulated<br>  MBP1 expression ratio $> 0.8$<br>    CLN2 expression ratio $\leq 0.5$ = upregulated<br>    CLN2 expression ratio $> 0.5$<br>      HCT1 expression ratio $\leq 0.9$ = upregulated<br>      HCT1 expression ratio $> 0.9$ = downregulated<br>CLN1 expression ratio $> 1.2$ = downregulated                                                                                                  |

|             |                                                                                                                                                                                                                                                                                                                                                                                |
|-------------|--------------------------------------------------------------------------------------------------------------------------------------------------------------------------------------------------------------------------------------------------------------------------------------------------------------------------------------------------------------------------------|
| <b>SIC1</b> | SWI4 expression ratio $\leq 1.1$<br>  CLN3 expression ratio $\leq 1.4$ = downregulated<br>  CLN3 expression ratio $> 1.4$ = upregulated<br>SWI4 expression ratio $> 1.1$ = upregulated                                                                                                                                                                                         |
| <b>SWI6</b> | SWI5 expression ratio $\leq 0.6$ = upregulated<br>SWI5 expression ratio $> 0.6$<br>  CLB4 expression ratio $\leq 1.3$<br>    CLN3 expression ratio $\leq 0.8$<br>      SIC1 expression ratio $\leq 1$ = downregulated<br>      SIC1 expression ratio $> 1$ = upregulated<br>    CLN3 expression ratio $> 0.8$ = downregulated<br>  CLB4 expression ratio $> 1.3$ = upregulated |
| <b>MCM1</b> | CDC53 expression ratio $\leq 0.7$ = upregulated<br>CDC53 expression ratio $> 0.7$<br>  HCT1 expression ratio $\leq 0.8$ = upregulated<br>  HCT1 expression ratio $> 0.8$ = downregulated                                                                                                                                                                                       |
| <b>CLN1</b> | CDC20 expression ratio $\leq 0.8$ = upregulated<br>CDC20 expression ratio $> 0.8$<br>  CLN2 expression ratio $\leq 1.2$ = downregulated<br>  CLN2 expression ratio $> 1.2$ = upregulated                                                                                                                                                                                       |
| <b>CLN2</b> | SWI5 expression ratio $\leq 1.1$<br>  CLN1 expression ratio $\leq 0.8$<br>    CDC28 expression ratio $\leq 0.9$ = upregulated<br>    CDC28 expression ratio $> 0.9$ = downregulated<br>  CLN1 expression ratio $> 0.8$ = upregulated<br>SWI5 expression ratio $> 1.1$ = downregulated                                                                                          |
| <b>CLN3</b> | SKP1 expression ratio $\leq 1.3$<br>  CLB4 expression ratio $\leq 1.6$<br>    SWI5 expression ratio $\leq 1.7$ = upregulated<br>    SWI5 expression ratio $> 1.7$ = downregulated<br>  CLB4 expression ratio $> 1.6$ = downregulated<br>SKP1 expression ratio $> 1.3$ = downregulated                                                                                          |
| <b>CLB1</b> | CLB2 expression ratio $\leq 1$ = downregulated<br>CLB2 expression ratio $> 1$ = upregulated                                                                                                                                                                                                                                                                                    |
| <b>CLB2</b> | CLB1 expression ratio $\leq 0.9$ = downregulated<br>CLB1 expression ratio $> 0.9$ = upregulated                                                                                                                                                                                                                                                                                |
| <b>CLB4</b> | CLN3 expression ratio $\leq 1$<br>  CDC34 expression ratio $\leq 0.8$ = downregulated<br>  CDC34 expression ratio $> 0.8$ = upregulated<br>CLN3 expression ratio $> 1$ = downregulated                                                                                                                                                                                         |
| <b>CLB5</b> | CLB6 expression ratio $\leq 1.1$<br>  MCM1 expression ratio $\leq 0.9$ = downregulated<br>  MCM1 expression ratio $> 0.9$<br>    SKP1 expression ratio $\leq 1.2$ = upregulated<br>    SKP1 expression ratio $> 1.2$ = downregulated<br>CLB6 expression ratio $> 1.1$ = upregulated                                                                                            |
| <b>CLB6</b> | CLB5 expression ratio $\leq 1.1$<br>  SWI5 expression ratio $\leq 1.7$ = downregulated<br>  SWI5 expression ratio $> 1.7$ = upregulated<br>CLB5 expression ratio $> 1.1$ = upregulated                                                                                                                                                                                         |

| <b>Gene name</b> | <b>Time delay<br/>20 genes</b>                                                                                                                                                                                                                                                                                                                                                                                                       |
|------------------|--------------------------------------------------------------------------------------------------------------------------------------------------------------------------------------------------------------------------------------------------------------------------------------------------------------------------------------------------------------------------------------------------------------------------------------|
| <b>CDC28</b>     | MBP1 expression ratio $\leq 0.7$ = upregulated next step<br>MBP1 expression ratio $> 0.7$<br>  SWI4 expression ratio $\leq 0.7$ = upregulated next step<br>  SWI4 expression ratio $> 0.7$ = downregulated next step                                                                                                                                                                                                                 |
| <b>MBP1</b>      | CDC34 expression ratio $\leq 0.9$<br>  SWI4 expression ratio $\leq 0.9$<br>    SIC1 expression ratio $\leq 0.6$ = downregulated next step<br>    SIC1 expression ratio $> 0.6$ = upregulated next step<br>  SWI4 expression ratio $> 0.9$ = downregulated next step<br>CDC34 expression ratio $> 0.9$ = upregulated next step                                                                                                        |
| <b>CDC53</b>     | SIC1 expression ratio $\leq 0.5$ = downregulated next step<br>SIC1 expression ratio $> 0.5$<br>  CLN1 expression ratio $\leq 0.5$ = downregulated next step<br>  CLN1 expression ratio $> 0.5$ = upregulated next step                                                                                                                                                                                                               |
| <b>CDC34</b>     | MBP1 expression ratio $\leq 1.2$ = downregulated next step<br>MBP1 expression ratio $> 1.2$<br>  CLB4 expression ratio $\leq 0.7$ = downregulated next step<br>  CLB4 expression ratio $> 0.7$ = upregulated next step                                                                                                                                                                                                               |
| <b>SWI5</b>      | CLB1 expression ratio $\leq 1$<br>  CLN3 expression ratio $\leq 0.8$ = upregulated next step<br>  CLN3 expression ratio $> 0.8$ = downregulated next step<br>CLB1 expression ratio $> 1$ = upregulated next step                                                                                                                                                                                                                     |
| <b>SKP1</b>      | MBP1 expression ratio $\leq 1.2$ = downregulated next step<br>MBP1 expression ratio $> 1.2$<br>  CLB4 expression ratio $\leq 0.7$ = downregulated next step<br>  CLB4 expression ratio $> 0.7$ = upregulated next step                                                                                                                                                                                                               |
| <b>SWI4</b>      | CDC28 expression ratio $\leq 1.1$<br>  CLN3 expression ratio $\leq 0.9$ = downregulated next step<br>  CLN3 expression ratio $> 0.9$<br>    CLN2 expression ratio $\leq 0.8$ = downregulated next step<br>    CLN2 expression ratio $> 0.8$ = upregulated next step<br>CDC28 expression ratio $> 1.1$ = upregulated next step                                                                                                        |
| <b>HCT1</b>      | SWI5 expression ratio $\leq 1.6$<br>  SWI5 expression ratio $\leq 1.2$<br>    CLB1 expression ratio $\leq 0.8$<br>      CLN1 expression ratio $\leq 1.9$ = downregulated next step<br>      CLN1 expression ratio $> 1.9$ = upregulated next step<br>    CLB1 expression ratio $> 0.8$ = upregulated next step<br>  SWI5 expression ratio $> 1.2$ = downregulated next step<br>SWI5 expression ratio $> 1.6$ = upregulated next step |
| <b>CDC20</b>     | CLB1 expression ratio $\leq 0.6$ = downregulated next step<br>CLB1 expression ratio $> 0.6$<br>  CDC34 expression ratio $\leq 1.4$ = upregulated next step<br>  CDC34 expression ratio $> 1.4$ = downregulated next step                                                                                                                                                                                                             |
| <b>SIC1</b>      | CLN3 expression ratio $\leq 1$ = downregulated next step<br>CLN3 expression ratio $> 1$ = upregulated next step                                                                                                                                                                                                                                                                                                                      |
| <b>SWI6</b>      | SKP1 expression ratio $\leq 0.9$<br>  CLN2 expression ratio $\leq 0.8$ = downregulated next step<br>  CLN2 expression ratio $> 0.8$ = upregulated next step<br>SKP1 expression ratio $> 0.9$ = downregulated next step                                                                                                                                                                                                               |

|             |                                                                                                                                                                                                                                                                                                                                                                                                                       |
|-------------|-----------------------------------------------------------------------------------------------------------------------------------------------------------------------------------------------------------------------------------------------------------------------------------------------------------------------------------------------------------------------------------------------------------------------|
| <b>MCM1</b> | <p>CDC53 expression ratio <math>\leq 0.9</math>= downregulated next step<br/> CDC53 expression ratio <math>&gt; 0.9</math><br/>   CLB4 expression ratio <math>\leq 0.9</math><br/>     CLB4 expression ratio <math>\leq 0.6</math>= upregulated next step<br/>     CLB4 expression ratio <math>&gt; 0.6</math>= downregulated next step<br/>   CLB4 expression ratio <math>&gt; 0.9</math>= upregulated next step</p> |
| <b>CLN1</b> | <p>SWI5 expression ratio <math>\leq 1.1</math>= upregulated next step<br/> SWI5 expression ratio <math>&gt; 1.1</math>= downregulated next step</p>                                                                                                                                                                                                                                                                   |
| <b>CLN2</b> | <p>CLB1 expression ratio <math>\leq 1</math>= upregulated next step<br/> CLB1 expression ratio <math>&gt; 1</math>= downregulated next step</p>                                                                                                                                                                                                                                                                       |
| <b>CLN3</b> | <p>CDC53 expression ratio <math>\leq 1</math>= upregulated next step<br/> CDC53 expression ratio <math>&gt; 1</math>= downregulated next step</p>                                                                                                                                                                                                                                                                     |
| <b>CLB1</b> | <p>CLB6 expression ratio <math>\leq 1.2</math>= upregulated next step<br/> CLB6 expression ratio <math>&gt; 1.2</math>= downregulated next step</p>                                                                                                                                                                                                                                                                   |
| <b>CLB2</b> | <p>CLB6 expression ratio <math>\leq 1.2</math>= upregulated next step<br/> CLB6 expression ratio <math>&gt; 1.2</math>= downregulated next step</p>                                                                                                                                                                                                                                                                   |
| <b>CLB4</b> | <p>CLN1 expression ratio <math>\leq 0.7</math>= downregulated next step<br/> CLN1 expression ratio <math>&gt; 0.7</math><br/>   MBP1 expression ratio <math>\leq 0.7</math>= downregulated next step<br/>   MBP1 expression ratio <math>&gt; 0.7</math>= upregulated next step</p>                                                                                                                                    |
| <b>CLB5</b> | <p>CLB1 expression ratio <math>\leq 1.9</math><br/>   SIC1 expression ratio <math>\leq 0.5</math>= downregulated next step<br/>   SIC1 expression ratio <math>&gt; 0.5</math>= upregulated next step<br/> CLB1 expression ratio <math>&gt; 1.9</math>= downregulated next step</p>                                                                                                                                    |
| <b>CLB6</b> | <p>SWI5 expression ratio <math>\leq 0.8</math>= upregulated next step<br/> SWI5 expression ratio <math>&gt; 0.8</math><br/>   CLB4 expression ratio <math>\leq 0.7</math>= upregulated next step<br/>   CLB4 expression ratio <math>&gt; 0.7</math>= downregulated next step</p>                                                                                                                                      |

| <b>Gene name</b> | <b>Changes<br/>20 genes</b>                                                                                                                                                                                                                                                                                                                                                                                                                        |
|------------------|----------------------------------------------------------------------------------------------------------------------------------------------------------------------------------------------------------------------------------------------------------------------------------------------------------------------------------------------------------------------------------------------------------------------------------------------------|
| <b>CDC28</b>     | SWI5 positive change = no change<br>SWI5 no change<br>  CLB6 positive change = positive change<br>  CLB6 no change<br>    HCT1 positive change = no change<br>    HCT1 no change<br>      SWI4 positive change = no change<br>      SWI4 no change = no change<br>      SWI4 negative change = positive change<br>    HCT1 negative change = negative change<br>  CLB6 negative change = positive change<br>SWI5 negative change = negative change |
| <b>MBP1</b>      | CDC34 positive change = negative change<br>CDC34 no change = no change<br>CDC34 negative change = positive change                                                                                                                                                                                                                                                                                                                                  |
| <b>CDC53</b>     | MBP1 positive change<br>  CLB4 positive change = positive change<br>  CLB4 no change = no change<br>  CLB4 negative change = positive change<br>MBP1 no change = no change<br>MBP1 negative change<br>  SWI5 positive change = negative change<br>  SWI5 no change = negative change<br>  SWI5 negative change = no change                                                                                                                         |
| <b>CDC34</b>     | MBP1 positive change = negative change<br>MBP1 no change = no change<br>MBP1 negative change = positive change                                                                                                                                                                                                                                                                                                                                     |
| <b>SWI5</b>      | CLN2 positive change = negative change<br>CLN2 no change = no change<br>CLN2 negative change = no change                                                                                                                                                                                                                                                                                                                                           |
| <b>SKP1</b>      | CDC34 positive change = positive change<br>CDC34 no change = no change<br>CDC34 negative change = negative change                                                                                                                                                                                                                                                                                                                                  |
| <b>SWI4</b>      | CLB1 positive change = no change<br>CLB1 no change<br>  SKP1 positive change<br>    CDC53 positive change = no change<br>    CDC53 no change = positive change<br>    CDC53 negative change = no change<br>  SKP1 no change = no change<br>  SKP1 negative change<br>    CLB4 positive change = negative change<br>    CLB4 no change = negative change<br>    CLB4 negative change = no change<br>CLB1 negative change = positive change          |
| <b>HCT1</b>      | CLN2 positive change = no change<br>CLN2 no change = no change<br>CLN2 negative change = positive change                                                                                                                                                                                                                                                                                                                                           |

|              |                                                                                                                                                                                                                                                                                                                                     |
|--------------|-------------------------------------------------------------------------------------------------------------------------------------------------------------------------------------------------------------------------------------------------------------------------------------------------------------------------------------|
| <b>CDC20</b> | MBP1 positive change<br>  SWI4 positive change = no change<br>  SWI4 no change = negative change<br>  SWI4 negative change = no change<br>MBP1 no change = positive change<br>MBP1 negative change<br>  CDC28 positive change = no change<br>  CDC28 no change = positive change<br>  CDC28 negative change = no change             |
| <b>SIC1</b>  | = no change                                                                                                                                                                                                                                                                                                                         |
| <b>SWI6</b>  | SKP1 positive change<br>  CDC53 positive change = positive change<br>  CDC53 no change = positive change<br>  CDC53 negative change = no change<br>SKP1 no change<br>  CLB1 positive change = positive change<br>  CLB1 no change = positive change<br>  CLB1 negative change = no change<br>SKP1 negative change = negative change |
| <b>MCM1</b>  | CDC34 positive change<br>  SWI4 positive change = positive change<br>  SWI4 no change = no change<br>  SWI4 negative change = positive change<br>CDC34 no change = no change<br>CDC34 negative change = negative change                                                                                                             |
| <b>CLN1</b>  | = no change                                                                                                                                                                                                                                                                                                                         |
| <b>CLN2</b>  | CLB5 positive change = positive change<br>CLB5 no change = no change<br>CLB5 negative change = negative change                                                                                                                                                                                                                      |
| <b>CLN3</b>  | CLB4 positive change = negative change<br>CLB4 no change = no change<br>CLB4 negative change = positive change                                                                                                                                                                                                                      |
| <b>CLB1</b>  | CLB2 positive change = positive change<br>CLB2 no change = no change<br>CLB2 negative change = negative change                                                                                                                                                                                                                      |
| <b>CLB2</b>  | CLB1 positive change = positive change<br>CLB1 no change = no change<br>CLB1 negative change = negative change                                                                                                                                                                                                                      |
| <b>CLB4</b>  | SKP1 positive change<br>  CLN3 positive change = no change<br>  CLN3 no change = no change<br>  CLN3 negative change = positive change<br>SKP1 no change = no change<br>SKP1 negative change<br>  CDC53 positive change = negative change<br>  CDC53 no change = no change<br>  CDC53 negative change = negative change             |
| <b>CLB5</b>  | CLN2 positive change = positive change<br>CLN2 no change = no change<br>CLN2 negative change = negative change                                                                                                                                                                                                                      |
| <b>CLB6</b>  | = no change                                                                                                                                                                                                                                                                                                                         |

| <b>Gene name</b> | <b>Simultaneous Cyclins</b>                                                                                                                                                                                                                                                     |
|------------------|---------------------------------------------------------------------------------------------------------------------------------------------------------------------------------------------------------------------------------------------------------------------------------|
| <b>CLN1</b>      | CLN2 expression ratio $\leq 1.1$ = downregulated<br>CLN2 expression ratio $> 1.1$ = upregulated                                                                                                                                                                                 |
| <b>CLN2</b>      | CLB2 expression ratio $\leq 0.9$ = upregulated<br>CLB2 expression ratio $> 0.9$ = downregulated                                                                                                                                                                                 |
| <b>CLN3</b>      | CLB4 expression ratio $\leq 0.9$<br>  CLB2 expression ratio $\leq 1.9$ = upregulated<br>  CLB2 expression ratio $> 1.9$ = downregulated<br>CLB4 expression ratio $> 0.9$<br>  CLB1 expression ratio $\leq 2.1$ = downregulated<br>  CLB1 expression ratio $> 2.1$ = upregulated |
| <b>CLB1</b>      | CLB2 expression ratio $\leq 1$ = downregulated<br>CLB2 expression ratio $> 1$ = upregulated                                                                                                                                                                                     |
| <b>CLB2</b>      | CLB1 expression ratio $\leq 0.9$ = downregulated<br>CLB1 expression ratio $> 0.9$ = upregulated                                                                                                                                                                                 |
| <b>CLB4</b>      | CLN3 expression ratio $\leq 1$<br>  CLB2 expression ratio $\leq 1.9$ = upregulated<br>  CLB2 expression ratio $> 1.9$ = downregulated<br>CLN3 expression ratio $> 1$ = downregulated                                                                                            |
| <b>CLB5</b>      | CLB6 expression ratio $\leq 1.1$<br>  CLN3 expression ratio $\leq 1.2$ = downregulated<br>  CLN3 expression ratio $> 1.2$ = upregulated<br>CLB6 expression ratio $> 1.1$ = upregulated                                                                                          |
| <b>CLB6</b>      | CLB5 expression ratio $\leq 1.1$<br>  CLB2 expression ratio $\leq 1.9$ = downregulated<br>  CLB2 expression ratio $> 1.9$ = upregulated<br>CLB5 expression ratio $> 1.1$ = upregulated                                                                                          |

| <b>Gene name</b> | <b>Time delay<br/>Cyclins</b>                                                                                                                                                                                                                                                                                                                                                                                                        |
|------------------|--------------------------------------------------------------------------------------------------------------------------------------------------------------------------------------------------------------------------------------------------------------------------------------------------------------------------------------------------------------------------------------------------------------------------------------|
| <b>CLN1</b>      | CLB2 expression ratio $\leq 0.9$ = upregulated next step<br>CLB2 expression ratio $> 0.9$<br>  CLB4 expression ratio $\leq 1.7$ = downregulated next step<br>  CLB4 expression ratio $> 1.7$ = upregulated next step                                                                                                                                                                                                                 |
| <b>CLN2</b>      | CLB1 expression ratio $\leq 1$ = upregulated next step<br>CLB1 expression ratio $> 1$ = downregulated next step                                                                                                                                                                                                                                                                                                                      |
| <b>CLN3</b>      | CLB2 expression ratio $\leq 1.6$<br>  CLB4 expression ratio $\leq 1.7$<br>    CLB1 expression ratio $\leq 0.6$<br>      CLB2 expression ratio $\leq 0.5$ = downregulated next step<br>      CLB2 expression ratio $> 0.5$ = upregulated next step<br>    CLB1 expression ratio $> 0.6$ = downregulated next step<br>  CLB4 expression ratio $> 1.7$ = upregulated next step<br>CLB2 expression ratio $> 1.6$ = upregulated next step |
| <b>CLB1</b>      | CLB6 expression ratio $\leq 1.2$ = upregulated next step<br>CLB6 expression ratio $> 1.2$ = downregulated next step                                                                                                                                                                                                                                                                                                                  |
| <b>CLB2</b>      | CLB6 expression ratio $\leq 1.2$ = upregulated next step<br>CLB6 expression ratio $> 1.2$ = downregulated next step                                                                                                                                                                                                                                                                                                                  |
| <b>CLB4</b>      | CLN1 expression ratio $\leq 0.7$ = downregulated next step<br>CLN1 expression ratio $> 0.7$<br>  CLB1 expression ratio $\leq 0.6$<br>    CLB2 expression ratio $\leq 0.5$ = upregulated next step<br>    CLB2 expression ratio $> 0.5$ = downregulated next step<br>  CLB1 expression ratio $> 0.6$ = upregulated next step                                                                                                          |
| <b>CLB5</b>      | CLB1 expression ratio $\leq 1.9$ = upregulated next step<br>CLB1 expression ratio $> 1.9$ = downregulated next step                                                                                                                                                                                                                                                                                                                  |
| <b>CLB6</b>      | CLB2 expression ratio $\leq 0.9$ = upregulated next step<br>CLB2 expression ratio $> 0.9$<br>  CLB4 expression ratio $\leq 0.7$ = upregulated next step<br>  CLB4 expression ratio $> 0.7$ = downregulated next step                                                                                                                                                                                                                 |



| <b>Gene name</b> | <b>Changes<br/>Cyclins</b>                                                                                     |
|------------------|----------------------------------------------------------------------------------------------------------------|
| <b>CLN1</b>      | = no change                                                                                                    |
| <b>CLN2</b>      | CLB5 positive change = positive change<br>CLB5 negative change = negative change<br>CLB5 no change = no change |
| <b>CLN3</b>      | CLB4 positive change = negative change<br>CLB4 negative change = positive change<br>CLB4 no change = no change |
| <b>CLB1</b>      | CLB2 positive change = positive change<br>CLB2 negative change = negative change<br>CLB2 no change = no change |
| <b>CLB2</b>      | CLB1 positive change = positive change<br>CLB1 negative change = negative change<br>CLB1 no change = no change |
| <b>CLB4</b>      | CLN3 positive change = negative change<br>CLN3 negative change = positive change<br>CLN3 no change = no change |
| <b>CLB5</b>      | CLN2 positive change = positive change<br>CLN2 negative change = negative change<br>CLN2 no change = no change |
| <b>CLB6</b>      | = no change                                                                                                    |
