# Supplementary material
Source: PubMed Central journal article supplement (PMC151290)
Supplement: gb-2003-4-1-r6-s4.pdf [file gb-2003-4-1-r6-s4.pdf]

| Gene name          | <b>Simultaneous, 20 genes</b> |                    |                    |                    |
|--------------------|-------------------------------|--------------------|--------------------|--------------------|
|                    | <i>cdc28</i>                  | <i>alpha</i>       | <i>Overall</i>     | <i>CV-10</i>       |
| <i>cdc28</i>       | 0.525±0.222                   | 0.522±0.216        | 0.540±0.159        | -                  |
| <i>mbp1</i>        | 0.475±0.222                   | 0.645±0.204        | 0.540±0.159        | -                  |
| <i>cdc53</i>       | 0.525±0.222                   | 0.307±0.194        | 0.434±0.158        | -                  |
| <i>cdc34</i>       | 0.576±0.218                   | 0.596±0.211        | 0.593±0.157        | -                  |
| <b><i>swi5</i></b> | <b>0.779±0.169</b>            | <b>0.741±0.180</b> | <b>0.778±0.128</b> | <b>0.770±0.030</b> |
| <i>skp1</i>        | 0.576±0.218                   | 0.596±0.211        | 0.593±0.157        | -                  |
| <i>swi4</i>        | 0.424±0.218                   | 0.355±0.204        | 0.381±0.155        | -                  |
| <i>hct1</i>        | 0.576±0.218                   | 0.404±0.211        | 0.513±0.160        | -                  |
| <i>cdc20</i>       | 0.475±0.222                   | 0.645±0.204        | 0.540±0.159        | -                  |
| <i>sic1</i>        | 0.627±0.212                   | 0.500±0.216        | 0.566±0.158        | -                  |
| <i>swi6</i>        | 0.525±0.222                   | 0.404±0.211        | 0.487±0.160        | -                  |
| <i>mcm1</i>        | 0.525±0.222                   | 0.500±0.216        | 0.513±0.160        | -                  |
| <b><i>cln1</i></b> | <b>0.829±0.143</b>            | <b>0.838±0.136</b> | <b>0.858±0.102</b> | <b>0.808±0.020</b> |
| <b><i>cln2</i></b> | <b>0.931±0.069</b>            | <b>0.789±0.161</b> | <b>0.884±0.090</b> | <b>0.711±0.049</b> |
| <i>cln3</i>        | 0.424±0.218                   | 0.500±0.216        | 0.434±0.158        | -                  |
| <b><i>clb1</i></b> | <b>0.829±0.143</b>            | <b>0.838±0.136</b> | <b>0.858±0.102</b> | <b>0.958±0.000</b> |
| <b><i>clb2</i></b> | <b>0.829±0.143</b>            | <b>0.741±0.180</b> | <b>0.805±0.121</b> | <b>0.958±0.000</b> |
| <i>clb4</i>        | 0.627±0.212                   | 0.596±0.211        | 0.619±0.155        | -                  |
| <i>clb5</i>        | 0.678±0.202                   | 0.596±0.211        | 0.646±0.152        | -                  |
| <b><i>clb6</i></b> | <b>0.829±0.143</b>            | <b>0.838±0.136</b> | <b>0.858±0.102</b> | <b>0.839±0.032</b> |

**Time delay, 20 genes**

| Gene name          | <i>cdc28</i>       | <i>alpha</i>       | <i>Overall</i>     | <i>CV-10</i>       |
|--------------------|--------------------|--------------------|--------------------|--------------------|
| <i>cdc28</i>       | 0.500±0.228        | 0.373±0.212        | 0.430±0.163        | -                  |
| <i>mbp1</i>        | 0.447±0.226        | 0.627±0.212        | 0.514±0.164        | -                  |
| <i>cdc53</i>       | 0.607±0.221        | 0.373±0.212        | 0.514±0.164        | -                  |
| <i>cdc34</i>       | 0.447±0.226        | 0.424±0.218        | 0.430±0.163        | -                  |
| <i>swi5</i>        | 0.661±0.211        | 0.779±0.169        | 0.738±0.141        | 0.665±0.071        |
| <i>skp1</i>        | 0.447±0.226        | 0.678±0.202        | 0.542±0.164        | -                  |
| <i>swi4</i>        | 0.661±0.211        | 0.525±0.222        | 0.598±0.161        | -                  |
| <i>hct1</i>        | 0.500±0.228        | 0.576±0.218        | 0.514±0.164        | -                  |
| <i>cdc20</i>       | 0.607±0.221        | 0.728±0.188        | 0.682±0.151        | -                  |
| <i>sic1</i>        | 0.661±0.211        | 0.678±0.202        | 0.682±0.151        | -                  |
| <i>swi6</i>        | 0.500±0.228        | 0.475±0.222        | 0.486±0.164        | -                  |
| <i>mcm1</i>        | 0.340±0.211        | 0.475±0.222        | 0.402±0.161        | -                  |
| <i>cln1</i>        | 0.820±0.151        | 0.678±0.202        | 0.766±0.134        | -                  |
| <b><i>cln2</i></b> | <b>0.820±0.151</b> | <b>0.728±0.188</b> | <b>0.794±0.127</b> | <b>0.837±0.029</b> |
| <i>cln3</i>        | 0.500±0.228        | 0.272±0.188        | 0.374±0.158        | -                  |
| <b><i>clb1</i></b> | <b>0.820±0.151</b> | <b>0.829±0.143</b> | <b>0.850±0.107</b> | <b>0.833±0.025</b> |
| <b><i>clb2</i></b> | <b>0.820±0.151</b> | <b>0.931±0.069</b> | <b>0.906±0.078</b> | <b>0.796±0.026</b> |
| <i>clb4</i>        | 0.607±0.221        | 0.678±0.202        | 0.654±0.155        | -                  |
| <i>clb5</i>        | 0.554±0.226        | 0.576±0.218        | 0.570±0.163        | -                  |
| <i>clb6</i>        | 0.661±0.211        | 0.576±0.218        | 0.626±0.158        | -                  |

**Changes, 20 genes**

| Gene name          | <i>cdc28</i>       | <i>alpha</i>       | <i>Overall</i>     | <i>CV-10</i>       |
|--------------------|--------------------|--------------------|--------------------|--------------------|
| <i>cdc28</i>       | 0.554±0.226        | 0.171±0.143        | 0.374±0.158        | -                  |
| <i>mbp1</i>        | 0.393±0.221        | 0.678±0.202        | 0.514±0.164        | -                  |
| <i>cdc53</i>       | 0.500±0.228        | 0.576±0.218        | 0.514±0.164        | -                  |
| <i>cdc34</i>       | 0.393±0.221        | 0.678±0.202        | 0.514±0.164        | -                  |
| <i>swi5</i>        | 0.714±0.197        | 0.576±0.218        | 0.654±0.155        | 0.833±0.000        |
| <i>skp1</i>        | 0.340±0.211        | 0.576±0.218        | 0.430±0.163        | -                  |
| <i>swi4</i>        | 0.554±0.226        | 0.576±0.218        | 0.570±0.163        | -                  |
| <i>hct1</i>        | 0.607±0.221        | 0.322±0.202        | 0.486±0.164        | -                  |
| <i>cdc20</i>       | 0.234±0.178        | 0.678±0.202        | 0.430±0.163        | -                  |
| <i>sic1</i>        | 0.767±0.178        | 0.322±0.202        | 0.570±0.163        | -                  |
| <i>swi6</i>        | 0.180±0.151        | 0.221±0.169        | 0.178±0.118        | -                  |
| <i>mcm1</i>        | 0.500±0.228        | 0.728±0.188        | 0.598±0.161        | -                  |
| <i>cln1</i>        | 0.767±0.178        | 0.728±0.188        | 0.766±0.134        | -                  |
| <i>cln2</i>        | 0.447±0.226        | 0.728±0.188        | 0.570±0.163        | -                  |
| <i>cln3</i>        | 0.447±0.226        | 0.576±0.218        | 0.486±0.164        | -                  |
| <b><i>clb1</i></b> | <b>0.714±0.197</b> | <b>0.728±0.188</b> | <b>0.738±0.141</b> | <b>0.833±0.000</b> |
| <b><i>clb2</i></b> | <b>0.714±0.197</b> | <b>0.728±0.188</b> | <b>0.738±0.141</b> | <b>0.833±0.000</b> |
| <i>clb4</i>        | 0.500±0.228        | 0.728±0.188        | 0.598±0.161        | -                  |
| <i>clb5</i>        | 0.447±0.226        | 0.576±0.218        | 0.486±0.164        | 0.833±0.000        |
| <i>clb6</i>        | 0.607±0.221        | 0.728±0.188        | 0.682±0.151        | -                  |

**Simultaneous, cyclins**

| Gene name   | <i>cdc28</i>       | <i>alpha</i>       | <i>Overall</i>     | <i>CV-10</i>       |
|-------------|--------------------|--------------------|--------------------|--------------------|
| <b>cln1</b> | <b>0.728±0.188</b> | <b>0.885±0.115</b> | <b>0.831±0.112</b> | <b>0.892±0.036</b> |
| <b>cln2</b> | <b>0.829±0.143</b> | <b>0.741±0.180</b> | <b>0.805±0.121</b> | <b>0.751±0.048</b> |
| cln3        | 0.424±0.218        | 0.596±0.211        | 0.487±0.160        | -                  |
| <b>clb1</b> | <b>0.829±0.143</b> | <b>0.838±0.136</b> | <b>0.858±0.102</b> | <b>0.958±0.000</b> |
| <b>clb2</b> | <b>0.829±0.143</b> | <b>0.741±0.180</b> | <b>0.805±0.121</b> | <b>0.958±0.000</b> |
| clb4        | 0.525±0.222        | 0.645±0.204        | 0.593±0.157        | -                  |
| clb5        | 0.829±0.143        | 0.596±0.211        | 0.725±0.140        | 0.768±0.041        |
| clb6        | 0.728±0.188        | 0.596±0.211        | 0.672±0.149        | -                  |

| Gene name   | Time delay, cyclins |                    |                    |                    |
|-------------|---------------------|--------------------|--------------------|--------------------|
|             | <i>cdc28</i>        | <i>alpha</i>       | <i>Overall</i>     | <i>CV-10</i>       |
| cln1        | 0.714±0.197         | 0.678±0.202        | 0.710±0.147        | 0.652±0.038        |
| <b>cln2</b> | <b>0.820±0.151</b>  | <b>0.728±0.188</b> | <b>0.794±0.127</b> | <b>0.841±0.032</b> |
| cln3        | 0.607±0.221         | 0.779±0.169        | 0.710±0.147        | -                  |
| <b>clb1</b> | <b>0.820±0.151</b>  | <b>0.829±0.143</b> | <b>0.850±0.107</b> | <b>0.883±0.017</b> |
| <b>clb2</b> | <b>0.820±0.151</b>  | <b>0.931±0.069</b> | <b>0.906±0.078</b> | <b>0.833±0.000</b> |
| clb4        | 0.447±0.226         | 0.678±0.202        | 0.542±0.164        | -                  |
| clb5        | 0.554±0.226         | 0.576±0.218        | 0.570±0.163        | -                  |
| clb6        | 0.714±0.197         | 0.627±0.212        | 0.682±0.151        | -                  |

**Changes, cyclins**

| Gene name   | <i>cdc28</i>       | <i>alpha</i>       | <i>Overall</i>     | <i>CV-10</i>       |
|-------------|--------------------|--------------------|--------------------|--------------------|
| cln1        | 0.767±0.178        | 0.728±0.188        | 0.766±0.134        | -                  |
| cln2        | 0.447±0.226        | 0.728±0.188        | 0.570±0.163        | -                  |
| cln3        | 0.447±0.226        | 0.576±0.218        | 0.486±0.164        | -                  |
| <b>clb1</b> | <b>0.714±0.197</b> | <b>0.728±0.188</b> | <b>0.738±0.141</b> | <b>0.833±0.000</b> |
| <b>clb2</b> | <b>0.714±0.197</b> | <b>0.728±0.188</b> | <b>0.738±0.141</b> | <b>0.833±0.000</b> |
| clb4        | 0.447±0.226        | 0.728±0.188        | 0.570±0.163        | -                  |
| clb5        | 0.447±0.226        | 0.576±0.218        | 0.486±0.164        | -                  |
| clb6        | 0.607±0.221        | 0.728±0.188        | 0.682±0.151        | -                  |
